# Supplementary material
Source: PubMed Central journal article supplement (PMC3946504)
Supplement: NIHMS516525-supplement-1.pdf [file NIHMS516525-supplement-1.pdf]

## Supplemental Data

### A Novel Aliphatic $^{18}\text{F}$ -Labeled Probe for PET Imaging of Melanoma

Hongguang Liu, Shuanglong Liu, Zheng Miao, Han Jiang, Zixin Deng, Xuechuan Hong, Zhen Cheng

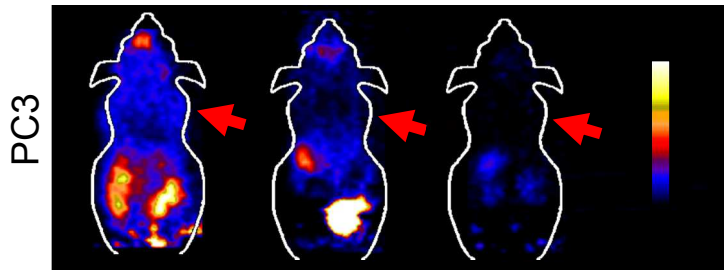

**Supplemental Figure 1.** Decay-corrected whole-body coronal microPET images of mice bearing PC3 tumor from a static scan at 0.5, 1, and 2 h after injection of  $^{18}\text{F}$ -FPDA. Tumors are indicated by red arrows .

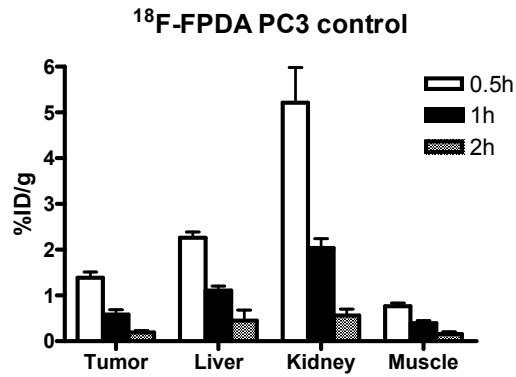

**Supplemental Figure 2.** Decay-corrected microPET quantification of athymic male nude mice bearing PC3 tumor from a static scan at 0.5, 1, and 2 h after injection of  $^{18}\text{F}$ -FPDA.
